# Supplementary material for: Socioeconomic Inequalities in Health in 22 European Countries
Source: Atypon-hosted journal article supplement (doi:10.1056/nejmsa0707519), 2008-06-04
Supplement: 2468_originally_published.pdf [file 2468_originally_published.pdf]

## Article as Originally Published

This article has been updated at [www.nejm.org](http://www.nejm.org). The original version has been provided as a service to readers.

Mackenbach JP, Stirbu I, Roskam A-JR, et al. Socioeconomic inequalities in health in 22 European countries. *N Engl J Med* 2008;358:2468-81.

## SPECIAL ARTICLE

# Socioeconomic Inequalities in Health in 22 European Countries

Johan P. Mackenbach, Ph.D., Irina Stirbu, M.Sc.,  
Albert-Jan R. Roskam, M.Sc., Maartje M. Schaap, M.Sc.,  
Gwenn Menvielle, Ph.D., Mall Leinsalu, Ph.D., and Anton E. Kunst, Ph.D.,  
for the European Union Working Group  
on Socioeconomic Inequalities in Health\*

## ABSTRACT

**BACKGROUND**

From the Department of Public Health, Erasmus University Medical Center, Rotterdam, the Netherlands (J.P.M., I.S., A.-J.R.R., M.M.S., G.M., A.E.K.); INSERM Unité 687, Saint-Maurice, France (G.M.); the Stockholm Center on Health of Societies in Transition, Södertörn University College, Södertörn, Sweden (M.L.); and the Department of Epidemiology and Biostatistics, National Institute for Health Development, Tallinn, Estonia (M.L.). Address reprint requests to Dr. Mackenbach at the Department of Public Health, Erasmus University Medical Center, P.O. Box 2040, 3000 CA Rotterdam, the Netherlands, or at j.mackenbach@erasmusmc.nl.

\*Other investigators who participated in the study are listed in the Appendix.

N Engl J Med 2008;358:2468-81.  
Copyright © 2008 Massachusetts Medical Society.

Comparisons among countries can help to identify opportunities for the reduction of inequalities in health. We compared the magnitude of inequalities in mortality and self-assessed health among 22 countries in all parts of Europe.

**METHODS**

We obtained data on mortality according to education level and occupational class from census-based mortality studies. Deaths were classified according to cause, including common causes, such as cardiovascular disease and cancer; causes related to smoking; causes related to alcohol use; and causes amenable to medical intervention, such as tuberculosis and hypertension. Data on self-assessed health, smoking, and obesity according to education and income were obtained from health or multipurpose surveys. For each country, the association between socioeconomic status and health outcomes was measured with the use of regression-based inequality indexes.

**RESULTS**

In almost all countries, the rates of death and poorer self-assessments of health were substantially higher in groups of lower socioeconomic status, but the magnitude of the inequalities between groups of higher and lower socioeconomic status was much larger in some countries than in others. Inequalities in mortality were small in some southern European countries and very large in most countries in the eastern and Baltic regions. These variations among countries appeared to be attributable in part to causes of death related to smoking or alcohol use or amenable to medical intervention. The magnitude of inequalities in self-assessed health also varied substantially among countries, but in a different pattern.

**CONCLUSIONS**

We observed variation across Europe in the magnitude of inequalities in health associated with socioeconomic status. These inequalities might be reduced by improving educational opportunities, income distribution, health-related behavior, or access to health care.

**I**NEQUALITIES IN HEALTH AMONG GROUPS of various socioeconomic status (as measured by education, occupation, and income) constitute one of the main challenges for public health,<sup>1</sup> but it is unknown to what extent such inequalities are modifiable. Because international comparative studies can help identify opportunities for reducing inequalities in health, we conducted a study aimed at measuring variations in the magnitude of inequalities in health among 22 European countries and at identifying some of the immediate determinants of these variations.

Europe offers excellent opportunities for this type of research because of the intercountry variety of political, cultural, economic, and epidemiologic histories and because good data on inequalities in health are often available.<sup>2</sup> In a previous study, we compared socioeconomically based inequalities in mortality and morbidity among 10 countries in western Europe during the 1980s.<sup>3-7</sup> We now report a study of the magnitude of inequalities in health in a much larger number of countries in both western and eastern Europe during the 1990s and early 2000s. The inclusion of eastern Europe allows us to determine whether countries that have gone through a turbulent period of political, economic, and health care reform<sup>8-12</sup> have larger inequalities in health than countries elsewhere in Europe.

---

## METHODS

---

We obtained data on mortality according to age, sex, cause of death, and indicators of socioeconomic status from mortality registries (Table 1). The data were based on 3.5 million deaths in 16 countries among more than 54 million persons ranging in age from 30 to 74 years at the beginning of the study. The data were drawn from national populations, except for the United Kingdom, with data from England and Wales only; Italy, with data from Turin only; and Spain, with data from Madrid, Barcelona, and the Basque country only. With regard to the mortality data from England and Wales, this article has received clearance from the Office for National Statistics Longitudinal Study (reference number 20037C). We performed two analyses of the data on death according to cause; one analysis focused on common causes of death (cancer, cardiovascular disease, and injuries), and the other focused on more specific causes of death (smoking-related causes, alcohol-related causes, and

causes amenable to medical intervention, such as tuberculosis and hypertension<sup>13,14</sup>). Code numbers of the causes of death according to the ninth and tenth revisions of the *International Classification of Diseases, Clinical Modification* (ICD-9-CM and ICD-10-CM) are given in Table 1 in the Supplementary Appendix, available with the full text of this article at [www.nejm.org](http://www.nejm.org).

Data on self-assessed health and risk factors for disease (e.g., smoking and obesity) according to age, sex, and indicators of socioeconomic status were obtained from national health or multipurpose surveys that also included self-reported socioeconomic data (Table 1). The data came from 19 countries and almost 350,000 respondents who ranged in age from 30 to 64 years in some surveys and from 30 to 69 years in others. All data are nationally representative. For self-reported illness, our study focused on the single-item question on self-assessed health ("How is your health in general?"), which has five possible answers, ranging from "very good" to "bad." In order to make use of the full range of levels of self-assessed health, we gave quantitative weights to each level (i.e., a multiplicative factor of 1.85 for each level worse than "very good") that were derived from the average number of chronic conditions in each level<sup>15</sup> (details of the calculation are given in the legend to Fig. 2). The only risk factors for disease for which data were available in a form that enabled them to be compared across countries were current tobacco smoking and obesity, defined as a body-mass index (the weight in kilograms divided by the square of the height in meters) greater than 30.

Socioeconomic status was measured by education, occupation, and income. Education levels were categorized as no education or primary education (up to approximately 6 years of education), lower secondary education (up to approximately 9 years), higher secondary education (up to approximately 11 years), and tertiary education (bachelor's degree or higher). Data on education level were available in a comparable form for most countries from both mortality registries and health interviews or multipurpose surveys. Occupations were classified as "manual" (considered the lower level) or "nonmanual." Data on occupation were available from mortality registries for middle-aged men in a limited number of countries only. Income was categorized in approximate quintiles of equivalent net household income. The self-reported

**Table 1. Countries Included in the Analysis and Sources of Data.**

| European Region | Country         | Mortality Data                                                                                                                 |           |                           | Morbidity Data |                                                                                                                         |                              |                    |
|-----------------|-----------------|--------------------------------------------------------------------------------------------------------------------------------|-----------|---------------------------|----------------|-------------------------------------------------------------------------------------------------------------------------|------------------------------|--------------------|
|                 |                 | Type of Study*                                                                                                                 | Years     | Person-years of Follow-up | No. of Deaths  | Survey                                                                                                                  | Years                        | No. of Respondents |
| North           | Finland         | National, longitudinal, census-linked mortality study                                                                          | 1990–2000 | 25,874,201                | 269,781        | Finbalt Health Monitor — National Public Health Institute, Helsinki                                                     | 1994, 1998, 2000, 2002, 2004 | 16,963             |
|                 | Sweden          | National, longitudinal, census-linked mortality study                                                                          | 1991–2000 | 43,537,681                | 404,151        | Swedish Survey of Living Conditions — Statistics Sweden, Stockholm                                                      | 2000–2001                    | 9,918              |
|                 | Norway          | National, longitudinal, census-linked mortality study                                                                          | 1990–2000 | 19,956,767                | 213,022        | Norwegian Survey of Living Conditions — Statistics Norway, Oslo                                                         | 2002                         | 5,918              |
|                 | Denmark         | National, longitudinal, census-linked mortality study                                                                          | 1996–2000 | 13,926,291                | 136,065        | Danish Health and Morbidity Survey — Danish National Institute of Public Health, Copenhagen                             | 2000                         | 14,503             |
| West            | United Kingdom  | National, longitudinal, census-linked mortality study for a representative sample of 1% of the population of England and Wales | 1991–1999 | 445,568                   | 3,867          | Health Survey for England — Department of Health, London                                                                | 2001                         | 13,960             |
|                 | Ireland         | Not available                                                                                                                  |           |                           |                | Living in Ireland Panel Survey — Economic and Social Research Institute, Dublin                                         | 1995–2002                    | 5,294              |
| Continental     | The Netherlands | Not available                                                                                                                  |           |                           |                | General Social Survey — Statistics Netherlands, Voorburg                                                                | 2003–2004                    | 13,782             |
|                 | Belgium         | National, longitudinal, census-linked mortality study                                                                          | 1991–1995 | 24,861,015                | 283,349        | Health Interview Survey — Institute of Public Health, Brussels                                                          | 1997–2001                    | 16,268             |
|                 | Germany         | Not available                                                                                                                  |           |                           |                | German National Health Examination and Interview Survey — Robert Koch Institut, Berlin                                  | 1998                         | 6,403              |
|                 | Switzerland†    | National, longitudinal, census-linked mortality study                                                                          | 1990–2000 | 27,910,587                | 255,251        | Not available                                                                                                           |                              |                    |
|                 | France‡         | National, longitudinal, census-linked mortality study for a representative sample of 1% of population                          | 1990–1999 | 2,404,246                 | 20,465         | French Health, Health Care and Insurance Survey — Institut de Recherche et Documentation en Economie de la Santé, Paris | 2004                         | 14,727             |
| South           | Italy           | Urban, longitudinal, census-linked mortality study for the city of Turin                                                       | 1991–2001 | 4,873,109                 | 50,621         | Health Conditions and Use of Health Services — National Institute of Statistics, Rome                                   | 1999–2000                    | 102,832            |
|                 |                 |                                                                                                                                |           |                           |                | Multipurpose Family Survey, Aspects of Daily Living — National Institute of Statistics, Rome                            | 2000                         | 43,011             |

|                |                                                                                |           |             |           |                              |         |
|----------------|--------------------------------------------------------------------------------|-----------|-------------|-----------|------------------------------|---------|
| Spain          | Urban, longitudinal, census-linked mortality study for the city of Barcelona   | 1992–2001 | 8,151,810   | 77,101    | 2001                         | 17,517  |
|                | Regional, longitudinal, census-linked mortality study for the region of Madrid | 1996–1997 | 3,663,333   | 22,585    |                              |         |
|                | Regional, longitudinal, census-linked mortality study for the Basque country   | 1996–2001 | 6,098,485   | 41,704    |                              |         |
| Portugal       | Not available                                                                  |           |             |           | 1998–1999                    | 34,840  |
| East           | National, longitudinal, census-linked mortality study                          | 1991–2000 | 9,647,452   | 101,557   |                              |         |
|                | National, unlinked, cross-sectional mortality study                            | 1999–2002 | 21,031,348  | 363,508   | 2000–2003                    | 9,179   |
| Czech Republic | National, unlinked, cross-sectional mortality study                            | 1999–2003 | 25,759,210  | 344,973   | 2002                         | 2,028   |
| Slovakia       | Not available                                                                  |           |             |           | 2002                         | 1,200   |
| Poland         | National, unlinked, cross-sectional mortality study                            | 2001–2003 | 54,883,245  | 717,743   | Not available                |         |
| Baltic         | National, unlinked, cross-sectional mortality study                            | 2000–2002 | 5,156,703   | 78,399    | 1994, 1998, 2000, 2002, 2004 | 10,336  |
| Latvia         | Not available                                                                  |           |             |           | 1998, 2000, 2002, 2004       | 6,779   |
| Estonia        | National, unlinked, cross-sectional mortality study                            | 1998–2002 | 3,435,255   | 60,794    | 2002, 2004                   | 3,525   |
| Total          |                                                                                |           | 301,690,841 | 3,444,686 |                              | 348,983 |

\* In longitudinal, census-linked, follow-up studies of mortality, socioeconomic status as determined during a census is linked to mortality data during a follow-up period after the census. In unlinked, cross-sectional studies of mortality, socioeconomic data mentioned on death certificates and elicited during the census have been used to classify the numerator and denominator of mortality, respectively.

† Non-Swiss nationals are excluded.

‡ Residents of overseas territories, members of the military, and students were excluded.

after-tax incomes of all household members, including benefits, were added, and the total was corrected for household size by dividing it by the total number of persons in the household to the power of 0.36. Income data were available from surveys in a limited number of countries only. Tables 2, 3, and 4 in the Supplementary Appendix show the distribution of study populations according to education level, occupational classification, and income level. The proportion of the population with less education tended to be large in the southern and eastern regions, whereas inequalities in income were large in England and Wales and in Portugal.

All measures were adjusted for age. Because both relative and absolute measures of inequalities in health are important, we have presented both the relative index of inequality and the slope index of inequality<sup>16,17</sup> for each country separately. Both indexes are regression-based measures that take into account the whole socioeconomic distribution and that remove variability in the size of socioeconomic groups as a source of variation in the magnitude of inequalities in health.<sup>17</sup> In the regression analysis, mortality, morbidity, or risk-factor prevalence was related to a measure of the rank of education, occupation, or income, in which the rank was calculated as the mean proportion of the population having a higher level of education, occupation, or income.

The relative index of inequality is the ratio between the estimated mortality, morbidity, or risk-factor prevalence among persons at rank 1 (the lowest education, occupation, or income level) and rank 0 (the highest level). The relative index of inequality was calculated with the use of Poisson regression analysis, which also generated 95% confidence intervals. The slope index of inequality measures absolute differences in rates (e.g., in deaths per 100,000 person-years) between the lowest and the highest ends of the socioeconomic scale. The slope index of inequality is derived from the relative index of inequality and the age-adjusted overall mortality rate according to the following formula:  $\text{slope index of inequality} = 2 \times \text{mortality rate} \times (\text{relative index of inequality} - 1) \div (\text{relative index of inequality} + 1)$ .<sup>16</sup> Because the slope index of inequality depends on the overall mortality rate in the population, we have presented these overall mortality rates together with the slope indexes of inequality.

---

## RESULTS

---

Figures 1A and 1B show relative inequalities in the rate of death from any cause according to education level. The relative index of inequality is greater than 1 for both men and women in all countries, indicating that, throughout Europe, mortality is higher among those with less education. The magnitude of these inequalities varies substantially among countries. For example, in Sweden and in England and Wales, the relative index of inequality for men is less than 2, indicating that mortality among those with the least education is less than twice that among those with the most education; on the other hand, in Hungary, the Czech Republic, and Poland, the relative index of inequality for men is 4 or higher, indicating that mortality differs by a factor of more than 4 between the lower and upper ends of the education scale. The smallest inequalities for both men and women are found in the Basque country of Spain, whereas the largest inequalities are found in the Czech Republic and Lithuania. Education-related inequalities in mortality are smaller than the average for Europe in all southern European populations included in this analysis and larger than average in most countries in the eastern and Baltic regions. Data on occupation-related inequalities in mortality among middle-aged men (Fig. 1C) confirm that relative inequalities in mortality tend to be smaller in southern European populations.

Table 2 shows that the international pattern observed for relative education-related inequalities in mortality also generally applies to absolute education-related inequalities in mortality, as indicated by the slope index of inequality. In Europe as a whole, persons with less education have higher rates of death from all causes except breast cancer, as indicated by a negative slope index of inequality for this cause of death. Inequalities in the rate of death from cardiovascular disease account for 33% of education-related inequalities in the rate of death from any cause among men (442 of 1328 deaths per 100,000 person-years) and 50% of those among women (246 of 489 deaths per 100,000 person-years). Although death from almost any cause is more frequent among those with less education than among those with more education, the range of variation for a single cause of death sometimes includes both "reverse" in-

**Figure 1. Relative Inequalities in the Rate of Death from Any Cause.**

Panel A shows inequalities between men with the lowest level of education and those with the highest, and Panel B shows education-related inequalities for women. Panel C shows inequalities between men in the lower and higher occupational classes. Economically inactive men whose last occupation was unknown were excluded from the analysis. Because exclusion of these men may lead to underestimation of mortality differences between occupational classes, we applied an adjustment procedure that was developed and tested in a previous European comparative study of inequalities in mortality; the procedure is based on national estimates of the proportion of economically inactive men in each occupational class and of the mortality rate ratio of inactive as compared with active men in each occupational class.<sup>18</sup>

equalities (higher mortality in groups with higher education) and “regular” inequalities (higher mortality in groups with lower education).

These data help to explain how smaller education-related inequalities in the rate of death from any cause in southern European populations and larger inequalities in the eastern and Baltic regions arise. Among men and women, smaller inequalities in the rate of death from any cause in the southern region are due mainly to smaller inequalities in the rate of death from cardiovascular disease. For example, among men in the Basque country, where the education-related inequality in the rate of death from any cause is below the European average, death from cardiovascular disease accounts for 45% of this difference (i.e., [442–16 deaths per 100,000 person-years] ÷ [1328–384 deaths per 100,000 person-years]). Larger inequalities in the rate of death from cardiovascular disease make an important contribution to larger inequalities in the rate of death from any cause in the eastern and Baltic regions as well; however, important contributions are also made by cancer in the eastern region and injuries in the Baltic region.

In Europe as a whole, inequalities in mortality from smoking-related conditions account for 21% of the inequalities in the rate of death from any cause among men and 6% of those among women (Table 2). Inequalities in smoking-related mortality tend to be larger in the eastern and Baltic regions (among men only) and smaller (or even “reverse”) in the southern region. In Europe as a whole, inequalities in alcohol-related mortality ac-

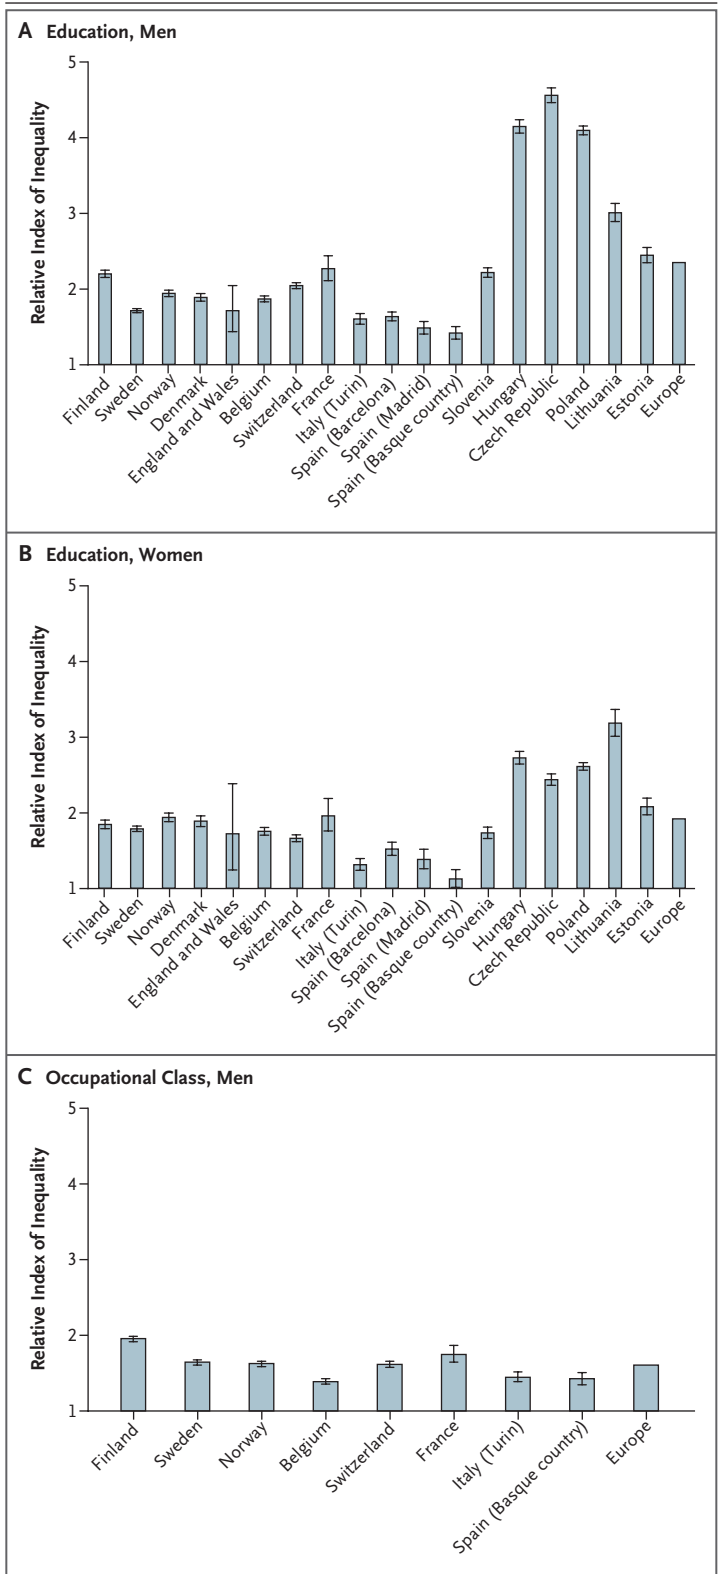

**Table 2. Absolute Inequalities in Overall and Cause-Specific Mortality Rates between Persons with the Lowest and Those with the Highest Level of Education.\***

| Country                            | Average Rate of Death from Any Cause† | Slope Index of Inequality According to Cause of Death<br><i>deaths/100,000 person-years</i> |                           |                |              |                            |                        |                         |          |                    |                         |                         | Causes Amenable to Medical Intervention‡ |  |  |  |
|------------------------------------|---------------------------------------|---------------------------------------------------------------------------------------------|---------------------------|----------------|--------------|----------------------------|------------------------|-------------------------|----------|--------------------|-------------------------|-------------------------|------------------------------------------|--|--|--|
|                                    |                                       | All Causes                                                                                  | All Cancer-Related Causes | Breast Cancer‡ | Lung Cancer‡ | All Cardiovascular Disease | Ischemic Heart Disease | Cerebrovascular Disease | Injuries | All Other Diseases | Alcohol-Related Causes§ | Smoking-Related Causes¶ |                                          |  |  |  |
| <b>Men</b>                         |                                       |                                                                                             |                           |                |              |                            |                        |                         |          |                    |                         |                         |                                          |  |  |  |
| Finland                            | 1673                                  | 1255                                                                                        | 213                       | 135            | 533          | 393                        | 94                     | 143                     | 347      | 101                | 215                     | 88                      |                                          |  |  |  |
| Sweden                             | 1188                                  | 625                                                                                         | 90                        | 37             | 309          | 229                        | 50                     | 52                      | 175      | 50                 | 71                      | 26                      |                                          |  |  |  |
| Norway                             | 1529                                  | 980                                                                                         | 169                       | 95             | 434          | 307                        | 78                     | 70                      | 305      | 62                 | 166                     | 49                      |                                          |  |  |  |
| Denmark                            | 1344                                  | 828                                                                                         | 126                       | 75             | 235          | 157                        | 39                     | 89                      | 363      | 23                 | 60                      | 44                      |                                          |  |  |  |
| United Kingdom (England and Wales) | 1005                                  | 529                                                                                         | 184                       | 92             | 189          | 132                        | 6                      | 9                       | 157      | 39                 | 154                     | NA                      |                                          |  |  |  |
| Belgium                            | 1510                                  | 915                                                                                         | 274                       | 179            | 233          | 99                         | 55                     | 64                      | 340      | 36                 | 302                     | 28                      |                                          |  |  |  |
| Switzerland                        | 1475                                  | 1012                                                                                        | 283                       | 136            | 291          | 132                        | 61                     | 91                      | 348      | 117                | 260                     | 61                      |                                          |  |  |  |
| France                             | 1241                                  | 1044                                                                                        | 333                       | 71             | 232          | 67                         | 68                     | 109                     | 357      | 196                | 204                     | 114                     |                                          |  |  |  |
| Italy (Turin)                      | 1377                                  | 639                                                                                         | 232                       | 107            | 140          | 57                         | 52                     | 23                      | 243      | 63                 | 177                     | 24                      |                                          |  |  |  |
| Spain (Barcelona)                  | 1370                                  | 662                                                                                         | 230                       | 90             | 88           | 26                         | 40                     | 38                      | 304      | 77                 | 218                     | 36                      |                                          |  |  |  |
| Spain (Madrid)                     | 1355                                  | 530                                                                                         | 181                       | 56             | 38           | -16                        | 11                     | 26                      | 278      | 75                 | 170                     | 34                      |                                          |  |  |  |
| Spain (Basque country)             | 1108                                  | 384                                                                                         | 107                       | 39             | 16           | -6                         | 3                      | 63                      | 177      | 46                 | 107                     | 24                      |                                          |  |  |  |
| Slovenia                           | 1902                                  | 1439                                                                                        | 303                       | 124            | 405          | 67                         | 219                    | 203                     | 482      | 224                | 327                     | 83                      |                                          |  |  |  |
| Hungary                            | 2110                                  | 2580                                                                                        | 666                       | 260            | 1003         | 482                        | 385                    | 222                     | 671      | 420                | 508                     | 66                      |                                          |  |  |  |
| Czech Republic                     | 1664                                  | 2130                                                                                        | 676                       | 247            | 825          | 472                        | 259                    | 138                     | 489      | 146                | 364                     | 73                      |                                          |  |  |  |
| Poland                             | 1804                                  | 2192                                                                                        | 589                       | 260            | 750          | 295                        | 223                    | 187                     | 637      | 145                | 408                     | 75                      |                                          |  |  |  |
| Lithuania                          | 2531                                  | 2536                                                                                        | 383                       | 197            | 807          | 505                        | 159                    | 643                     | 677      | 304                | 424                     | 195                     |                                          |  |  |  |
| Estonia                            | 2799                                  | 2349                                                                                        | 355                       | 191            | 929          | 610                        | 263                    | 436                     | 618      | 286                | 323                     | 162                     |                                          |  |  |  |
| Europe total                       | 1615                                  | 1328                                                                                        | 326                       | 152            | 442          | 229                        | 127                    | 147                     | 425      | 142                | 285                     | 72                      |                                          |  |  |  |

| Women                              | 811  | 483  | 49  | -8  | 14  | 262 | 168 | 72  | 25  | 161 | 31  | 28  | 42 |
|------------------------------------|------|------|-----|-----|-----|-----|-----|-----|-----|-----|-----|-----|----|
| Finland                            | 811  | 483  | 49  | -8  | 14  | 262 | 168 | 72  | 25  | 161 | 31  | 28  | 42 |
| Sweden                             | 673  | 381  | 73  | -6  | 20  | 172 | 104 | 44  | 8   | 128 | 15  | 39  | 18 |
| Norway                             | 811  | 518  | 103 | -14 | 44  | 239 | 141 | 62  | 5   | 169 | 16  | 79  | 30 |
| Denmark                            | 830  | 511  | 103 | -12 | 63  | 160 | 90  | 42  | 22  | 230 | 9   | 70  | 27 |
| United Kingdom (England and Wales) | 593  | 315  | 42  | -8  | 50  | 115 | 66  | 85  | -9  | 146 | 20  | 98  | NA |
| Belgium                            | 761  | 417  | 47  | -11 | 11  | 198 | 77  | 55  | 11  | 163 | 6   | 29  | 10 |
| Switzerland                        | 676  | 337  | 53  | -3  | 10  | 158 | 74  | 46  | 5   | 120 | 10  | 21  | 22 |
| France                             | 536  | 375  | 50  | 35  | 6   | 130 | 33  | 44  | 36  | 163 | 30  | 17  | 82 |
| Italy (Turin)                      | 721  | 197  | 15  | -17 | -9  | 94  | 34  | 34  | -3  | 94  | 8   | -4  | 11 |
| Spain (Barcelona)                  | 569  | 236  | 7   | -12 | -14 | 103 | 36  | 34  | 5   | 126 | 7   | -14 | 12 |
| Spain (Madrid)                     | 543  | 175  | -12 | -29 | -17 | 96  | 30  | 29  | -1  | 94  | -3  | -17 | 9  |
| Spain (Basque country)             | 422  | 51   | -76 | -19 | -20 | 56  | 23  | 17  | 7   | 74  | 3   | -24 | 2  |
| Slovenia                           | 853  | 459  | -13 | -21 | -18 | 263 | 62  | 127 | 28  | 180 | 44  | -3  | 33 |
| Hungary                            | 1023 | 948  | 120 | -17 | 20  | 511 | 237 | 216 | 51  | 258 | 82  | 61  | 26 |
| Czech Republic                     | 868  | 726  | 144 | 10  | 17  | 356 | 182 | 134 | 26  | 203 | 23  | 33  | 32 |
| Poland                             | 840  | 750  | 139 | 6   | 10  | 356 | 117 | 142 | 29  | 222 | 23  | 28  | 27 |
| Lithuania                          | 1053 | 1099 | 130 | 7   | 7   | 535 | 297 | 162 | 178 | 251 | 87  | 39  | 51 |
| Estonia                            | 1213 | 851  | 7   | -5  | 4   | 493 | 273 | 187 | 109 | 252 | 101 | 16  | 48 |
| Europe total                       | 766  | 489  | 54  | -8  | 8   | 246 | 117 | 86  | 30  | 173 | 30  | 28  | 27 |

\* Code numbers of the causes of death according to the 9th and 10th revisions of the *International Classification of Diseases, Clinical Modification* (ICD-9-CM and ICD-10-CM) are given in Table 1 of the Supplementary Appendix. The slope index of inequality is a regression-based measure of absolute differences in mortality rates between the lowest and the highest ends of the socioeconomic scale. NA denotes not available.

† Age-standardized rates of death for all educational groups are given.

‡ Rates of death from breast cancer among men are not given.

§ Alcohol-related causes are accidental poisoning by alcohol and alcoholic psychosis, dependence, abuse, cardiomyopathy, and cirrhosis of the liver and pancreas.

¶ Smoking-related causes are chronic obstructive pulmonary disease and cancer of the buccal cavity, pharynx, esophagus, larynx, trachea, bronchus, and lung.

|| Causes amenable to medical intervention are tuberculosis and other infectious and parasitic diseases, cervical cancer, breast cancer, Hodgkin's disease, leukemia, hypertension, cerebrovascular disease, pneumonia or influenza, appendicitis, hernia, peptic ulcer, cholelithiasis and cholecystitis, and complications of childbirth.

count for 11% of inequalities in the rate of death from any cause among men and 6% of those among women. Larger inequalities in alcohol-related mortality contribute to larger inequalities in the rate of death from any cause in Hungary (among men and women) and the Baltic region (among men only). In Europe as a whole, deaths from conditions amenable to medical intervention account for 5% of inequalities in the rate of death from any cause. However, these inequalities are larger than the European average in Lithuania and Estonia, where they contribute to the larger inequalities in the rate of death from any cause (among men only).

Figure 2 shows the relative inequalities in the prevalence of poorer self-assessed health (weighted on the basis of the burden of chronic disease) according to education and income level. The relative index of inequality is greater than 1 in all countries, indicating worse health in groups of lower socioeconomic status throughout Europe. The variation of this measure among countries is considerably less than that of inequalities in the rate of death from any cause, and the international pattern also tends to be different from that of death from any cause. In Italy and Spain, education-related inequalities in self-assessed health are smaller than average, a finding that mirrors the smaller education-related inequalities in the rate of death from any cause observed in Turin, Barcelona, Madrid, and the Basque country. In the Baltic region, on the other hand, education-related inequalities in self-assessed health are smaller than average, whereas education-related inequalities in death from any cause are larger. Income-related inequalities in self-assessed health are not larger in the eastern and Baltic regions than in other parts of Europe and are remarkably large in the northern and western regions, particularly England and Wales, where income inequalities are also large (see Table 4 in the Supplementary Appendix).

In Europe as a whole, both smoking and obesity are more common among people of lower education level; education-related inequalities in smoking are larger among men, and education-related inequalities in obesity are larger among women (Fig. 3). There are striking differences among countries in the magnitude and even the direction of these inequalities, however. Large education-related inequalities in smoking are seen in the northern, western, and continental regions;

small inequalities (and, among women, even reverse inequalities, in which smoking rates are higher in groups with more education) are seen in the southern region. In the eastern and Baltic regions, the pattern is unclear. Large education-related inequalities in obesity are seen in the southern region, particularly among women, for whom the relative indexes of inequality are above 4, indicating that the prevalence of obesity among those with the least education is more than four times higher than that among those with the most education. By contrast, education-related inequalities in obesity tend to be smaller than average in the eastern and Baltic regions.

---

## DISCUSSION

---

As compared with our study of inequalities in mortality and morbidity related to socioeconomic status in 10 western European countries during the 1980s,<sup>3</sup> the present, more extensive study of the situation during the 1990s and early 2000s found much larger among-country variability in the magnitude of inequalities in health. Inequalities in mortality from selected causes suggest that some variations may be attributable to socioeconomic differences in smoking, excessive alcohol consumption, and access to health care. We also found among-country variations in the magnitude of inequalities in self-assessed health, but in a different pattern, precluding a generalization from inequalities in mortality to inequalities in overall health.

Our study had several limitations. International comparability of data on socioeconomic inequalities in health is still imperfect, and the degree of comparability is likely to decline with increasing geographical coverage. There are differences among countries in various aspects of data collection, and some of these might affect the size of inequalities in health, as we have shown previously.<sup>18</sup> We found smaller inequalities in mortality in some urban, relatively prosperous southern European populations that are not necessarily representative of the whole of Italy or Spain. Some studies have shown, however, that inequalities in health tend to be larger in urban than in rural areas.<sup>19</sup> Our previous study in the 1980s, which used national data for Italy and Spain from methodologically less-refined sources, also showed smaller inequalities in mortality in these countries.<sup>4,5</sup> We found larger inequalities in mortality in the eastern and Baltic regions. All these coun-

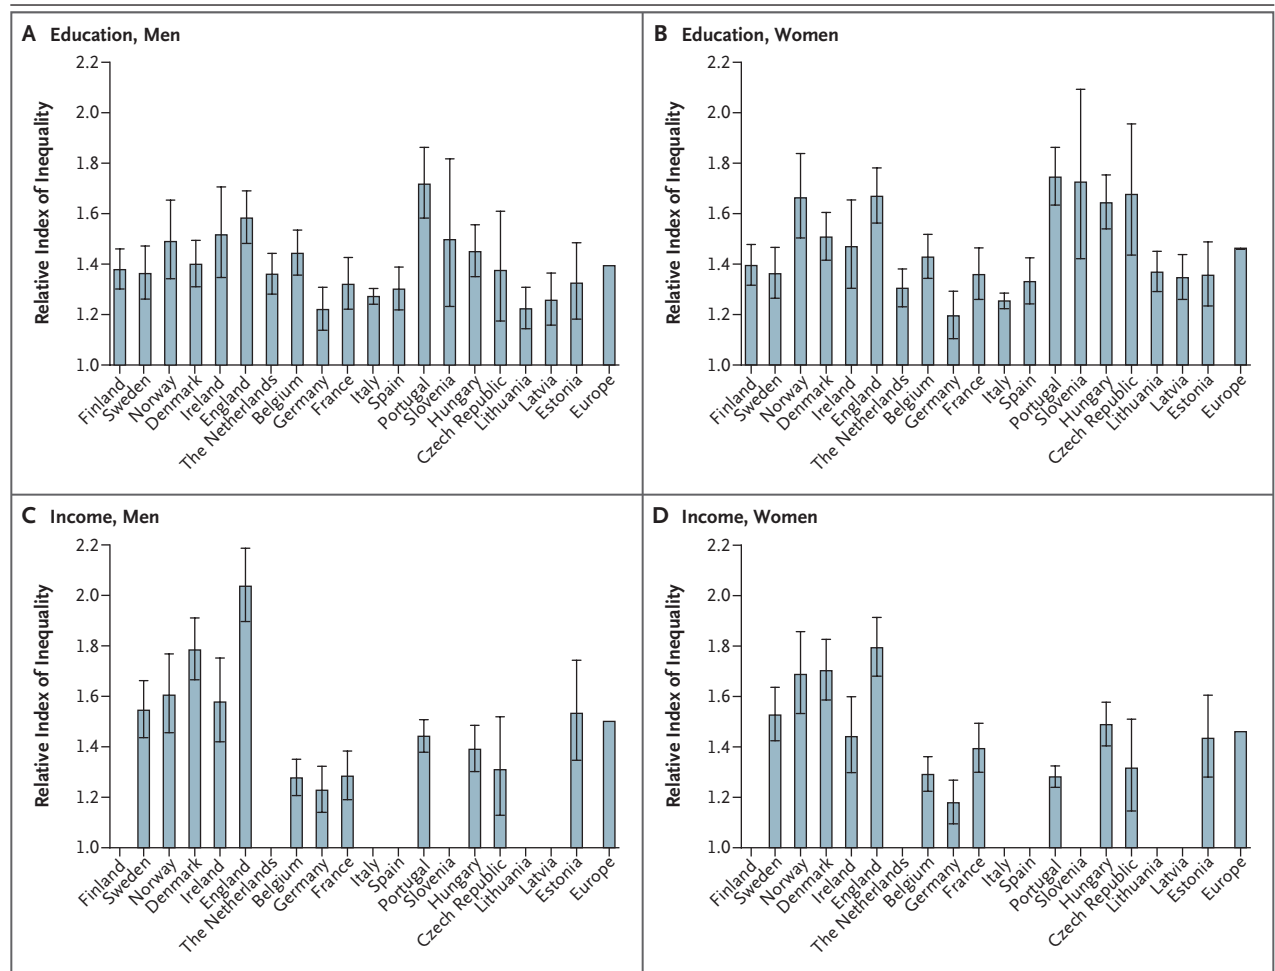

**Figure 2. Relative Inequalities in the Prevalence of Poorer Self-Assessed Health.**

Panels A and B show inequalities between persons with the lowest and those with the highest level of education for men and women, respectively. Panels C and D show inequalities between persons with the lowest and those with the highest level of income for men and women, respectively. In order to make use of the full range of levels of self-assessed health, we calculated the estimated burden of disease associated with each level on the basis of the number of chronic conditions reported by respondents to these surveys. Relative differences in self-reported chronic conditions between answer categories of the self-assessed health question were remarkably similar between countries and varied only marginally around a multiplicative factor of 1.85 (i.e., each step down on the self-assessed health scale was found to be associated with 1.85 times more chronic conditions). On the basis of this analysis, we assigned a weight for burden of disease to each category of answer to the question “How is your health in general?” “Very good” was assigned a weight of  $1.85^0=1$ , “good” a weight of  $1.85^1=1.85$ , “fair” a weight of  $1.85^2=3.42$ , and “poor” or “very poor” a weight of  $1.85^3=6.33$ . Sensitivity analyses showed that the ranking of countries according to the magnitude of inequalities in self-assessed health did not change when these weights were varied within the range of observed values.<sup>15</sup>

tries except Slovenia, which has smaller inequalities in mortality, provided data from cross-sectional, non-census-linked studies. Although this may suggest bias,<sup>20</sup> it is also possible that Slovenia, which is close to Italy, shares some of the favorable characteristics of the southern region.

Internationally comparable data on inequalities in specific determinants of mortality and morbidity are scarce, and we could study only smoking and obesity. The contribution to inequality of

other factors, such as alcohol consumption, use of health care, working and housing conditions, and psychosocial stressors, could not be studied directly.

Both smoking and obesity have been shown to contribute to inequalities in health related to socioeconomic status in studies of individual persons in some countries.<sup>21-23</sup> Obesity, however, is unlikely to be a major contributor to international variations in inequalities in health, because in-

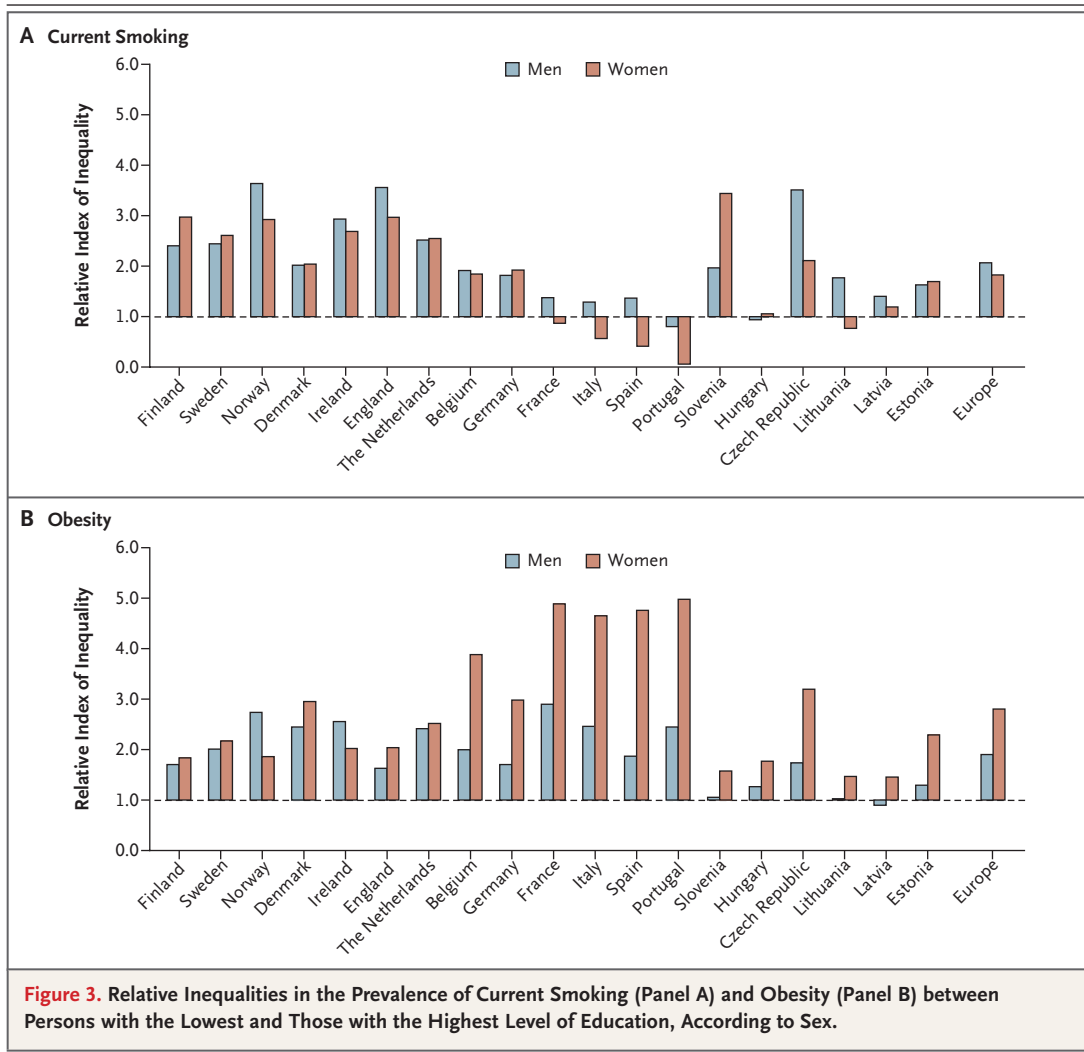

equalities in obesity related to socioeconomic status are large where inequalities in mortality related to socioeconomic status, particularly mortality from cardiovascular disease, are small (i.e., in the southern region). Smoking, on the other hand, does appear to be a major explanatory factor. It has been well documented that countries in the southern region are in an earlier stage of the smoking epidemic than countries in the northern, western, and continental regions.<sup>24,25</sup> We still found reverse inequalities in smoking among women and small inequalities among men, findings that are consistent with the smaller inequalities in mortality in the southern region, particularly from conditions related to smoking. The history of the smoking epidemic is much less well documented for the eastern and Baltic regions,<sup>26,27</sup> and it is therefore difficult to determine why in-

equalities in mortality from smoking-related conditions are large, whereas inequalities in smoking are often small.

The role of hazardous drinking (daily consumption of large amounts of alcohol-containing beverages, binge drinking, or consumption of surrogate alcohols) in generating high mortality rates in eastern Europe, particularly among men, has been well documented.<sup>28-30</sup> We have not been able to find comparable survey data on inequalities in alcohol consumption related to socioeconomic status in eastern Europe, but our analysis of cause-specific mortality suggests that rates of hazardous drinking are substantially higher in the lower than in the higher socioeconomic groups, particularly among men. Low levels of social support, lack of control over one's life, and material hardship, combined with a culture that approves of exces-

sive alcohol consumption, are likely to be involved.<sup>8,9</sup>

Although the role of deficiencies in health care in the high mortality rates of eastern Europe has been pointed out before,<sup>31,32</sup> our study demonstrates the magnitude of inequalities in mortality related to socioeconomic status from conditions amenable to medical intervention in this part of Europe. Our results suggest that inequalities in access to good-quality health care have a role in generating inequalities in mortality. Inequalities in access to health care leading to inequalities in survival from chronic conditions may also partly explain the discrepancy between our results for mortality and those for self-assessed health. Inequalities in the prevalence of poorer self-assessed health are the result of inequalities in both the incidence and the duration of health problems, which may be shortened by lower survival rates among less-educated persons in eastern Europe.

Smoking, obesity, excessive alcohol consumption, and deficiencies in health care represent only some of the immediate determinants of inequalities in health, and both lifestyle choices and patterns of use of health care are likely to be constrained by inequalities in general living conditions, as structured by political, economic, social, and cultural forces. Within western Europe, there is little evidence that among-country variations in the magnitude of inequalities in health are related to variations in political factors. For example, Italy and Spain have welfare policies that are less generous and less universal than those of northern Europe,<sup>33,34</sup> but they appear to have substantially smaller inequalities in mortality, perhaps partly because of cultural factors, such as the Mediterranean diet and the reluctance of women

to take up smoking.<sup>35,36</sup> Cultural factors seem to have prevented differences in access to material and other resources in these populations from translating into inequalities in lifestyle-related risk factors for mortality.

We also found no evidence for systematically smaller inequalities in health in countries in northern Europe. This is surprising, because these countries have long histories of egalitarian policies, reflected by, among other things, welfare policies. These policies provide a high level of social-security protection to all residents of the country, resulting in smaller income inequalities and lower poverty rates.<sup>33,34,37</sup> Our results suggest that although a reasonable level of social security and public services may be a necessary condition for smaller inequalities in health, it is not sufficient. Lifestyle-related risk factors have an important role in premature death in high-income countries<sup>38</sup> and also appear to contribute to the persistence of inequalities in mortality in the northern region.<sup>39</sup>

Our study shows that although inequalities in health associated with socioeconomic status are present everywhere, their magnitude is highly variable, particularly for inequalities in mortality. This result implies that there is opportunity to reduce inequalities in mortality. Developing policies and interventions that effectively target the structural and immediate determinants of inequalities in health is an urgent priority for public health research.<sup>40</sup>

Supported by a grant (2003125) from the Health and Consumer Protection Directorate-General of the European Union as a part of the Eurothine Project.

No potential conflict of interest relevant to this article was reported.

We thank the members of the Eurothine consortium for their comments and suggestions on a previous version of this manuscript.

#### APPENDIX

In addition to the authors, the following members of the European Union Working Group on Socioeconomic Inequalities in Health participated in this study: Scientific Institute of Public Health, Brussels — H. van Oyen, S. Demarest; Department of Demography and Geography, Faculty of Science, Charles University in Prague, Prague, Czech Republic — J. Rychtarikova; Department of Social Geography and Regional Development, Faculty of Science, Charles University in Prague, Prague, Czech Republic — D. Dzurava; National Institute of Public Health, Copenhagen — O. Andersen; National Institute of Public Health, University of Southern Denmark, Copenhagen — O. Ekholm; School for Health, University of Bath, Bath, England — K. Judge; National Institute for Health Development, Department of Epidemiology and Biostatistics, Tallinn, Estonia — M. Tekkel; Department of Health Promotion and Chronic Disease Prevention, National Public Health Institute, Helsinki — R. Prättälä; Department of Sociology, University of Helsinki, Helsinki — P. Martikainen; Institut National de la Statistique et des Études Économiques, Paris — G. Desplanques; Research and Information Institute for Health Economics, Paris — F. Jusot; Center for Social Policy Research, University of Bremen, Bremen, Germany — U. Helmer; Demographic Research Institute, Hungarian Central Statistical Office, Budapest, Hungary — K. Kovacs; Hungarian National Center of Epidemiology, Budapest, Hungary — F. Marton; Economic and Social Research Institute, Dublin — R. Layte; Department of Public Health, University of Turin, Turin, Italy — G. Costa; Servizio di Epidemiologia, Grugliasco, Italy — F. Vannoni; Faculty of Public Health, Riga Stradins University, Riga, Latvia — A. Villerusa; Kaunas University of Medicine, Kaunas, Lithuania — R. Kalediene, J. Klumbiene; Centraal Bureau voor de Statistiek, Voorburg, the Netherlands — J.J.M. Geurts; Research Program Care, Health and Welfare, Oslo University College, Oslo — E. Dahl; Division of Epidemiology, Norwegian Institute of Public Health, Oslo — B.H. Strand; Department of Medical Statistics, National Institute of Hygiene, Warsaw, Poland — B. Wojtyniak; Centro de Estudos Geográficos, Universidade de Coimbra,

Coimbra, Portugal — P. Santana; Košice Institute for Society and Health, Pavol Josef Safarik University, Košice, Slovakia — A. Madaraso-Geckova; Department of Public Health, Faculty of Medicine, Ljubljana, Slovenia — B. Artnik; Agencia de Salut Pública de Barcelona, Barcelona — C. Borrell; Research Unit, Department of Health, Basque Government, Vitoria-Gasteiz, Spain — S. Esnaola; Department of Preventive Medicine and Public Health, Universidad Complutense de Madrid, Madrid — E. Regidor; Department of Public Health Sciences, Karolinska Institute, Stockholm — B. Burström; Center for Health Equity Studies Stockholm, Stockholm University, Stockholm — J. Fritzell, O. Lundberg; Institute of Social and Preventive Medicine, University of Zurich, Zurich, Switzerland — M. Bopp; Office of National Statistics, Newport, United Kingdom — M. Glickman.

## REFERENCES

- Marmot M. Social determinants of health inequalities. *Lancet* 2005;365:1099-104.
- Kunst AE, Bos V, Mackenbach JP. Guidelines for monitoring health inequalities in the European Union. Rotterdam: the Netherlands: Department of Public Health, 2001.
- Mackenbach JP, Kunst AE, Cavelaars AEJM, Groenhouf F, Geurts JJ. Socioeconomic inequalities in morbidity and mortality in Western Europe. *Lancet* 1997;349:1655-9.
- Kunst AE, Groenhouf F, Mackenbach JP, Heath EW. Occupational class and cause-specific mortality in middle aged men in 11 European countries: comparison of population based studies. *BMJ* 1998;316:1636-42.
- Kunst AE, Groenhouf F, Mackenbach JP. Mortality by occupational class among men 30-64 years in 11 European countries. *Soc Sci Med* 1998;46:1459-76.
- Cavelaars AEJM, Kunst AE, Geurts JJM, et al. Differences in self-reported morbidity by educational level: a comparison of 11 Western European countries. *J Epidemiol Community Health* 1998;52:219-27.
- Cavelaars AEJM, Kunst AE, Geurts JJM, et al. Morbidity differences by occupational class among men in seven European countries: an application of the Erikson-Goldthorpe social class scheme. *Int J Epidemiol* 1998;27:222-30.
- Bobak M, Marmot M. East-West mortality divide and its potential explanations: proposed research agenda. *BMJ* 1996;312:421-5.
- McKee M, Shkolnikov V. Understanding the toll of premature death among men in eastern Europe. *BMJ* 2001;323:1051-5.
- Leinsalu M, Vägerö D, Kunst AE. Estonia 1989-2000: enormous increase in mortality differences by education. *Int J Epidemiol* 2003;32:1081-7.
- Shkolnikov VM, Andreev EM, Jasilionis D, Leinsalu M, Antonova OI, McKee M. The changing relation between education and life expectancy in central and eastern Europe in the 1990s. *J Epidemiol Community Health* 2006;60:875-81.
- Murphy M, Bobak M, Nicholson A, Rose R, Marmot M. The widening gap in mortality by educational level in the Russian Federation, 1980-2001. *Am J Public Health* 2006;96:1293-9.
- Charlton JR, Hartley RM, Silver R, Holland WW. Geographical variation in mortality from conditions amenable to medical intervention in England and Wales. *Lancet* 1983;1:691-6.
- Nolte E, McKee M. Measuring the health of nations: analysis of mortality amenable to health care. *BMJ* 2003;327:1129. [Erratum, *BMJ* 2004;328:494.]
- Kunst AE, Roskam AJ. Comparison of educational inequalities in general health in 12 European countries: application of an integral measure of self-assessed health. Rotterdam, the Netherlands: Department of Public Health, 2007. (Accessed May 12, 2008, at <http://www.eurothine.org>.)
- Pamuk ER. Social class inequality in mortality from 1921 to 1972 in England and Wales. *Popul Stud (Camb)* 1985;39:17-31.
- Mackenbach JP, Kunst AE. Measuring the magnitude of socio-economic inequalities in health: an overview of available measures illustrated with two examples from Europe. *Soc Sci Med* 1997;44:757-71.
- Kunst AE. Cross-national comparisons of socioeconomic differences in mortality. (Ph.D. thesis. Rotterdam, the Netherlands: Erasmus University, 1997.)
- Bos V, Kunst AE, Mackenbach JP. Socio-economic inequalities in mortality in the Netherlands: analyses on the basis of information at the neighborhood level. *TSG Tijdschrift voor Gezondheidswetenschappen* 2002;80:158-65. (In Dutch.)
- Shkolnikov VM, Jasilionis D, Andreev EM, Jdanov DA, Stankuniene V, Ambrozaitiene D. Linked versus unlinked estimates of mortality and length of life by education and marital status: evidence from the first record linkage study in Lithuania. *Soc Sci Med* 2007;64:1392-406.
- Davey Smith G, Blane D, Bartley M. Explanations for socio-economic differentials in mortality evidence from Britain and elsewhere. *Eur J Public Health* 1994;4:131-44.
- Pekkanen J, Tuomilehto J, Uutela A, Vartiainen E, Nissinen A. Social class, health behaviour, and mortality among men and women in eastern Finland. *BMJ* 1995;311:589-93.
- van Oort FVA, van Lenthe FJ, Mackenbach JP. Material, psychosocial, and behavioural factors in the explanation of educational inequalities in mortality in the Netherlands. *J Epidemiol Community Health* 2005;59:214-20.
- Lopez AD, Collishaw NE, Piha T. A descriptive model of the cigarette epidemic in developed countries. *Tobacco Control* 1994;3:242-7.
- Huisman M, Kunst AE, Mackenbach JP. Educational inequalities in smoking among men and women aged 16 years and older in eleven European countries. *Tobacco Control* 2005;14:106-13.
- Kubik AK, Parkin DM, Plesko I, et al. Patterns of cigarette sales and lung cancer mortality in some central and eastern European countries, 1960-1989. *Cancer* 1995;75:2452-60.
- Pudule I, Grinberga D, Kadziauskiene K, et al. Patterns of smoking in the Baltic Republics. *J Epidemiol Community Health* 1999;53:277-82.
- Leon DA, Chenet L, Shkolnikov VM, et al. Huge variation in Russian mortality rate 1984-94: artefact, alcohol, or what? *Lancet* 1997;350:383-8.
- Britton A, McKee M. The relation between alcohol and cardiovascular disease in Eastern Europe: explaining the paradox. *J Epidemiol Community Health* 2000;54:328-32.
- Powles JW, Zatonski W, Vander Hoorn S, Ezzati M. The contribution of leading diseases and risk factors to excess losses of healthy life in Eastern Europe: Burden of Disease study. *BMC Public Health* 2005;5:116.
- Velkova A, Wolleswinkel-van den Bosch JH, Mackenbach JP. The East-West life expectancy gap: differences in mortality from conditions amenable to medical intervention. *Int J Epidemiol* 1997;26:75-84.
- Nolte E, McKee M. Population health in Europe: how much is attributable to health care? *World Hosp Health Serv* 2004;40:12-4, 40, 42.
- Esping-Andersen G. The three worlds of welfare capitalism. Oxford, England: Polity Press, 1999.
- Ferrera M. The "Southern model" of welfare in social Europe. *J Eur Soc Policy* 1996;6:17-37.
- Mackenbach JP, Cavelaars AEJM, Kunst AE, Groenhouf F. Socioeconomic in-

- equalities in cardiovascular disease mortality: an international study. *Eur Heart J* 2000;21:1141-51.
36. Knuops KTB, de Groot LCPGM, Kromhout D, et al. Mediterranean diet, lifestyle factors, and 10-year mortality in elderly European men and women: the HALE project. *JAMA* 2004;292:1433-9.
37. Fritzell J. Still different? Income distribution in the Nordic countries in a European comparison. In: Kautto M, Fritzell J, Hvinden B, Kvist J, Uusitalo H, eds. *Nordic welfare states in the European context*. London: Routledge, 2001:18-41.
38. Ezzati M, Hoorn SV, Rodgers A, Lopez AD, Mathers CD, Murray CJ. Estimates of global and regional potential health gains from reducing multiple major risk factors. *Lancet* 2003;362:271-80. [Erratum, *Lancet* 2005;365:28.]
39. Dahl E, Fritzell J, Lahelma E, Martikainen P, Kunst A, Mackenbach J. Welfare state regimes and health inequalities. In: Siegrist J, Marmot M, eds. *Health inequalities in Europe*. Oxford, England: Oxford University Press, 2006:193-222.
40. Mackenbach JP, Bakker MJ. Tackling socioeconomic inequalities in health: an analysis of recent European experiences. *Lancet* 2003;362:1409-14.

Copyright © 2008 Massachusetts Medical Society.

#### JOURNAL EDITORIAL FELLOW

The *Journal's* editorial office invites applications for a one-year research fellowship beginning in July 2009 from individuals at any stage of training. The editorial fellow will work on *Journal* projects and will participate in the day-to-day editorial activities of the *Journal* but is expected in addition to have his or her own independent projects. Please send curriculum vitae and research interests to the Editor-in-Chief, 10 Shattuck St., Boston, MA 02115 (fax, 617-739-9864), by September 30, 2008.
