# Supplementary material for: Socioeconomic Inequalities in Health in 22 European Countries
Source: Atypon-hosted journal article supplement (doi:10.1056/nejmsa0707519), 2008-06-04
Supplement: nejm_mackenbach_2468sa1.pdf [file nejm_mackenbach_2468sa1.pdf]

## Supplementary Appendix

This appendix has been provided by the authors to give readers additional information about their work.

Supplement to: Mackenbach JP, Stirbu I, Roskam A-JR, et al. Socioeconomic inequalities in health in 22 European countries. *N Engl J Med* 2008;358:2468-81.

(This PDF was updated September 17, 2008. The change was to Web Table 2.)

**Web table 1. List of causes of death**

|     | Cause of death                                  | ICD 9 codes                    | ICD 10 codes                   |
|-----|-------------------------------------------------|--------------------------------|--------------------------------|
| 1.  | Tuberculosis                                    | 010-018,137                    | A15-19, B90                    |
| 2.  | Other infectious and parasitic diseases         | Rest (001-139)                 | Rest (A00-B99)                 |
| 3.  | Cancer of buccal cavity, pharynx and oesophagus | 140-150                        | C00-C15                        |
| 4.  | Cancer of stomach                               | 151                            | C16                            |
| 5.  | Cancer of colorectum                            | 153-154                        | C18-C21                        |
| 6.  | Cancer of liver                                 | 155                            | C22.0, C22.1, C22.9            |
| 7.  | Cancer of pancreas                              | 157                            | C25                            |
| 8.  | Cancer of larynx                                | 161                            | C30-32                         |
| 9.  | Cancer of trachea, bronchus, lung               | 162-163; 165                   | C33-C34; C39                   |
| 10. | Cancer of breast                                | 174-175                        | C50                            |
| 11. | Cancer of cervix uteri                          | 180                            | C53                            |
| 12. | Cancer of prostate                              | 185                            | C61                            |
| 13. | Cancer of testis                                | 186                            | C62                            |
| 14. | Cancer of kidney and bladder                    | 188-189                        | C64-C68                        |
| 15. | Hodgkin's disease and leukemia                  | 201, 204-208                   | C81, C91-C95                   |
| 16. | Other neoplasms                                 | Rest (140-239)                 | Rest (C00-D48)                 |
| 17. | Diabetes Mellitus                               | 250                            | E10-E14                        |
| 18. | Alcoholic psychosis, dependence, abuse          | 291, 303, 305.0                | F10                            |
| 19. | Epilepsy                                        | 345                            | G40-G41                        |
| 20. | Hypertension                                    | 401-405                        | I10-I15                        |
| 21. | Ischaemic heart disease                         | 410-414                        | I20-I25                        |
| 22. | Alcoholic cardiomyopathy                        | 425.5                          | I42.6                          |
| 23. | Chronic rheumatic heart disease                 | 390-398                        | I00-I09                        |
| 24. | Other heart disease                             | 416; 420-429                   | I26-I52; I98                   |
| 25. | Cerebrovascular disease                         | 430-438                        | I60-I69                        |
| 26. | Other circulatory diseases                      | Rest (390-459)                 | Rest (I00-I99)                 |
| 27. | Pneumonia/influenza                             | 487; 480-486                   | J10-J18                        |
| 28. | Asthma                                          | 493                            | J45-J46                        |
| 29. | Other COPD                                      | 490-494; 496                   | J40-J44; J47                   |
| 30. | Appendicitis, hernia, and peptic ulcer          | 531-534, 540-543, 550-553, 560 | K25-K28, K35-K38; K40-K46; K56 |
| 31. | Alcoholic cirrhosis of liver and pancreas       | 571.0-571.3, 577.0-577.1       | K70, K85-K86.0                 |
| 32. | Cholecystitis and lithiasis                     | 574-576                        | K80-K83                        |
| 33. | Other liver and gall bladder diseases           | Rest (570-577)                 | Rest (K70-K87)                 |
| 34. | Prostate hyperplasia                            | 600                            | N40                            |
| 35. | Maternal deaths                                 | 630-677                        | O 00-99                        |
| 36. | Symptoms and ill defined conditions             | 780-799                        | R00-R99                        |
| 37. | Road traffic accidents                          | E800-E829                      | V01-V89, Y85                   |
| 38. | Other traffic accidents                         | E830-E848                      | V80-V99                        |
| 39. | Accidental poisoning by alcohol                 | E860                           | X45                            |
| 40. | Accidental fall                                 | E880-888                       | W00-W19                        |
| 41. | Suicide                                         | E950-959                       | X60-X84, Y87.0                 |
| 42. | Homicide                                        | E960-E969                      | X85-Y09, Y87.1                 |
| 43. | Injuries, unknown whether intentional           | E980-989                       | Y10-Y24                        |
| 44. | Other external causes                           | Rest (E800-999)                | Rest (V01-Y98)                 |

**Web table 2. Distribution of the study populations by educational level (men and women, 30-74 years).**

| Country        | Educational level (%)      |                 |          |
|----------------|----------------------------|-----------------|----------|
|                | Primary or lower secondary | Upper secondary | Tertiary |
| Finland        | 48,9                       | 29.9            | 21.1     |
| Sweden         | 39,6                       | 42.3            | 18.1     |
| Norway         | 32,2                       | 48.3            | 19.5     |
| Denmark        | 44,7                       | 35.1            | 20.2     |
| England        | 81,4                       | 10,9            | 7,7      |
| Belgium        | 64,0                       | 20.5            | 15.5     |
| Switzerland    | 29,7                       | 54.9            | 15.5     |
| France         | 55,4                       | 32.8            | 11.8     |
| Turin          | 71,4                       | 19.8            | 8.7      |
| Barcelona      | 69,1                       | 14.7            | 16.1     |
| Madrid region  | 70,3                       | 14.8            | 14.9     |
| Basque country | 69,9                       | 16.8            | 13.3     |
| Slovenia       | 46.5                       | 42.6            | 11.0     |
| Hungary        | 64,3                       | 23.3            | 12.4     |
| Czech Republic | 63,5                       | 26.1            | 10.5     |
| Poland         | 57,1                       | 32.0            | 10.9     |
| Lithuania      | 31,7                       | 51.6            | 16.6     |
| Estonia        | 30,6                       | 51.9            | 17.5     |

Source: National or regional population census

**Web table 3.** Distribution of the study populations by occupational class (men 30-59 years).

| Country        | Occupational class (%) |            |       |
|----------------|------------------------|------------|-------|
|                | Manual                 | Non-manual | Other |
| Finland        | 34.6                   | 46.6       | 18.8  |
| Sweden         | 39.4                   | 38.2       | 22.4  |
| Norway         | 48.4                   | 40.7       | 12.9  |
| Belgium        | 38.0                   | 33.3       | 28.7  |
| Switzerland    | 53.3                   | 24.9       | 21.8  |
| France         | 46.2                   | 34.5       | 19.3  |
| Turin          | 37.3                   | 42.8       | 19.9  |
| Basque country | 36.5                   | 56.2       | 7.3   |

Source: National or regional population census

**Web table 4.** Distribution of the study populations by income level (both genders, 30-69 years).

| <b>Country</b>   | <b>Income quintile</b> | <b>Number of respondents</b> | <b>%</b> | <b>Average income<sup>*)</sup></b> |
|------------------|------------------------|------------------------------|----------|------------------------------------|
| <b>Sweden</b>    | Poorest                | 1205                         | 12,1     | n/a                                |
|                  | 2                      | 2092                         | 21,1     | n/a                                |
|                  | 3                      | 2160                         | 21,8     | n/a                                |
|                  | 4                      | 2196                         | 22,1     | n/a                                |
|                  | Richest                | 2265                         | 22,8     | n/a                                |
|                  | <i>Missing</i>         | 0                            | 0,0      | n/a                                |
|                  |                        | 9918                         |          |                                    |
| <b>Norway</b>    | Poorest                | 1180                         | 19,9     | 1355                               |
|                  | 2                      | 1181                         | 20,0     | 1968                               |
|                  | 3                      | 1181                         | 20,0     | 2398                               |
|                  | 4                      | 1181                         | 20,0     | 2888                               |
|                  | Richest                | 1181                         | 20,0     | 4503                               |
|                  | <i>Missing</i>         | 14                           | 0,2      | -                                  |
|                  |                        | 5918                         |          |                                    |
| <b>Denmark</b>   | Poorest                | 2629                         | 18,1     | 1130                               |
|                  | 2                      | 2535                         | 17,5     | 1945                               |
|                  | 3                      | 2789                         | 19,2     | 2665                               |
|                  | 4                      | 2463                         | 17,0     | 3411                               |
|                  | Richest                | 2571                         | 17,7     | 5247                               |
|                  | <i>Missing</i>         | 1516                         | 10,5     | -                                  |
|                  |                        | 14503                        |          |                                    |
| <b>Ireland</b>   | Poorest                | 1208                         | 22,8     | n/a                                |
|                  | 2                      | 1085                         | 20,5     | n/a                                |
|                  | 3                      | 1037                         | 19,6     | n/a                                |
|                  | 4                      | 985                          | 18,6     | n/a                                |
|                  | Richest                | 979                          | 18,5     | n/a                                |
|                  | <i>Missing</i>         | 0                            | 0,0      | n/a                                |
|                  |                        | 5294                         |          |                                    |
| <b>England/W</b> | Poorest                | 2233                         | 16,0     | 610                                |
|                  | 2                      | 2320                         | 16,6     | 1132                               |
|                  | 3                      | 2271                         | 16,3     | 1777                               |
|                  | 4                      | 2307                         | 16,5     | 2735                               |
|                  | Richest                | 2239                         | 16,0     | 5794                               |
|                  | <i>Missing</i>         | 2590                         | 18,6     | -                                  |
|                  |                        | 13960                        |          |                                    |
| <b>Belgium</b>   | Poorest                | 3208                         | 19,7     | 303                                |
|                  | 2                      | 3255                         | 20,0     | 771                                |
|                  | 3                      | 3131                         | 19,2     | 1007                               |
|                  | 4                      | 3240                         | 19,9     | 1282                               |
|                  | Richest                | 3207                         | 19,7     | 1977                               |
|                  | <i>Missing</i>         | 227                          | 1,4      | -                                  |
|                  |                        | 16268                        |          |                                    |
| <b>Germany</b>   | Poorest                | 1002                         | 15,6     | 556                                |
|                  | 2                      | 991                          | 15,5     | 882                                |
|                  | 3                      | 1003                         | 15,7     | 1095                               |
|                  | 4                      | 1033                         | 16,1     | 1382                               |

|                   |                |       |      |      |
|-------------------|----------------|-------|------|------|
|                   | Richest        | 1022  | 16,0 | 2226 |
|                   | <i>Missing</i> | 1352  | 21,1 | -    |
|                   |                | 6403  |      |      |
| <b>France</b>     | Poorest        | 2078  | 15,1 | 582  |
|                   | 2              | 2098  | 15,2 | 1009 |
|                   | 3              | 2059  | 15,0 | 1318 |
|                   | 4              | 2091  | 15,2 | 1698 |
|                   | Richest        | 2066  | 15,0 | 3185 |
|                   | <i>Missing</i> | 3379  | 24,5 | -    |
|                   |                | 13771 |      |      |
| <b>Portugal</b>   | Poorest        | 5323  | 15,3 | 129  |
|                   | 2              | 8358  | 24,0 | 320  |
|                   | 3              | 7619  | 21,9 | 546  |
|                   | 4              | 6332  | 18,2 | 815  |
|                   | Richest        | 7208  | 20,7 | 1545 |
|                   | <i>Missing</i> | 0     | 0,0  | -    |
|                   |                | 34840 |      |      |
| <b>Hungary</b>    | Poorest        | 1597  | 17,4 | 101  |
|                   | 2              | 1584  | 17,3 | 153  |
|                   | 3              | 1643  | 17,9 | 197  |
|                   | 4              | 1547  | 16,9 | 258  |
|                   | Richest        | 1572  | 17,1 | 461  |
|                   | <i>Missing</i> | 1236  | 13,5 | -    |
| <b>Czech Rep.</b> | Poorest        | 386   | 19,0 | 53   |
|                   | 2              | 409   | 20,2 | 94   |
|                   | 3              | 369   | 18,2 | 121  |
|                   | 4              | 389   | 19,2 | 160  |
|                   | Richest        | 370   | 18,2 | 262  |
|                   | <i>Missing</i> | 105   | 5,2  | -    |
|                   |                | 2028  |      |      |
| <b>Estonia</b>    | Poorest        | 401   | 11,4 | n/a  |
|                   | 2              | 501   | 14,2 | n/a  |
|                   | 3              | 452   | 12,8 | n/a  |
|                   | 4              | 522   | 14,8 | n/a  |
|                   | Richest        | 422   | 12,0 | n/a  |
|                   | <i>Missing</i> | 1227  | 34,8 | n/a  |
|                   |                | 3525  |      |      |

Note (\*) Average monthly household income (in euros), including all income components received by any household member, after subtraction of taxes and social premiums. Total household income was corrected for household size through division by the number of household members raised to the power 0.36.

n/a = only percentile

or categorical data were available in the original data source, which permitted a classification in approximate quintiles but not a calculation of mean income per quintile.

Source: National health or multipurpose survey (see table 1)
